# Supplementary material for: Evaluation of new Corvis ST parameters in normal, Post-LASIK, Post-LASIK keratectasia and keratoconus eyes
Source: PubMed Central journal article supplement (PMC7105482; doi:10.1038/s41598-020-62825-y), 2020-03-30
Supplement: 41598_2020_62825_MOESM1_ESM.pdf [file 41598_2020_62825_MOESM1_ESM.pdf]

**Evaluation of new Corvis ST parameters in normal, Post-LASIK, Post-LASIK keratectasia and keratoconus eyes**

**Authors:**

Kaili Yang, Liyan Xu, Qi Fan, Yuwei Gu, Peng Song, Bo Zhang, Dongqing Zhao, Chenjiu Pang\*, Shengwei Ren\*

**Authors affiliations:**

Henan Provincial People's Hospital, Henan Eye Hospital, Henan Eye Institute, People's Hospital of Zhengzhou University, Henan University People's Hospital, Zhengzhou, 450003, China.

**\* Correspondence authors**

Shengwei Ren and Chenjiu Pang

Henan Provincial People's Hospital

Henan Eye Hospital, Henan Eye Institute

People's Hospital of Zhengzhou University

Henan University People's Hospital

7 Weiwu Road, Zhengzhou, 450003, Henan, *PR* China

Phone: +86 371 65580908

E-mail: [shengweiren1984@163.com](mailto:shengweiren1984@163.com) and [pangcj999@163.com](mailto:pangcj999@163.com)

**Supplementary Table 1** Data of Corvis ST parameters among normal, LASIK, KE and KC eyes.

| Parameters(mean±SD)      | Normal     | LASIK      | KE         | KC         | <i>P</i> | <i>P</i> * | <i>P</i> ** | <i>P</i> *** | <i>P</i> <sup>#</sup> | <i>P</i> <sup>##</sup> | <i>P</i> <sup>@@</sup> |
|--------------------------|------------|------------|------------|------------|----------|------------|-------------|--------------|-----------------------|------------------------|------------------------|
| DA Max(mm)               | 1.15±0.07  | 1.22±0.09  | 1.32±0.13  | 1.32±0.12  | <0.001   | 0.078      | <0.001      | <0.001       | 0.009                 | 0.010                  | 1.000                  |
| A1T(ms)                  | 6.97±0.12  | 6.77±0.18  | 6.77±0.26  | 6.65±0.22  | <0.001   | 0.006      | 0.007       | <0.001       | 1.000                 | 0.187                  | 0.17                   |
| A1V(m/s)                 | 0.16±0.01  | 0.15±0.02  | 0.17±0.03  | 0.18±0.01  | <0.001   | 0.567      | 0.117       | 0.012        | 0.003                 | <0.0010                | 0.813                  |
| A2T(ms)                  | 22.3±0.28  | 22.61±0.37 | 22.56±0.26 | 22.30±0.43 | 0.002    | 0.015      | 0.057       | 1.000        | 0.961                 | 0.015                  | 0.056                  |
| A2V(m/s)                 | -0.29±0.03 | -0.30±0.03 | -0.34±0.05 | -0.33±0.06 | <0.001   | 0.989      | 0.003       | 0.012        | 0.009                 | 0.028                  | 0.977                  |
| HCT(ms)                  | 17.38±0.47 | 17.53±0.73 | 17.38±0.53 | 17.49±0.55 | 0.746    | 0.813      | 1.000       | 0.916        | 0.813                 | 0.995                  | 0.916                  |
| PD(mm)                   | 5.21±0.22  | 5.43±0.17  | 5.30±0.29  | 5.14±0.31  | 0.001    | 0.020      | 0.602       | 0.78         | 0.322                 | 0.001                  | 0.134                  |
| Radius(mm)               | 6.50±0.38  | 5.70±0.46  | 4.73±0.64  | 5.05±0.66  | <0.001   | <0.001     | <0.001      | <0.001       | <0.001                | 0.001                  | 0.208                  |
| A1DA(mm)                 | 0.12±0.01  | 0.11±0.01  | 0.13±0.02  | 0.14±0.01  | <0.001   | <0.001     | 0.055       | 0.001        | <0.001                | <0.001                 | 0.492                  |
| HCDA(mm)                 | 1.15±0.07  | 1.22±0.09  | 1.32±0.13  | 1.32±0.12  | <0.001   | 0.078      | <0.001      | <0.001       | 0.009                 | 0.01                   | 1.000                  |
| A2DA(mm)                 | 0.37±0.06  | 0.37±0.07  | 0.39±0.08  | 0.44±0.10  | 0.012    | 0.983      | 0.945       | 0.036        | 0.794                 | 0.013                  | 0.134                  |
| A1DLL(mm)                | 2.10±0.43  | 1.92±0.30  | 2.23±0.24  | 2.29±0.16  | <0.001   | 0.176      | 0.492       | 0.156        | 0.005                 | <0.001                 | 0.915                  |
| HCDLL(mm)                | 6.61±0.54  | 6.40±0.86  | 6.00±1.04  | 6.38±0.50  | 0.074    | 0.78       | 0.047       | 0.732        | 0.321                 | 1.000                  | 0.365                  |
| A2DLL(mm)                | 2.79±1.05  | 2.91±1.18  | 2.99±1.06  | 3.19±0.80  | 0.612    | 0.977      | 0.918       | 0.555        | 0.995                 | 0.808                  | 0.917                  |
| A1DLA(mm)                | 0.09±0.01  | 0.07±0.01  | 0.10±0.02  | 0.10±0.01  | <0.001   | 0.002      | 0.001       | <0.001       | <0.001                | <0.001                 | 1.000                  |
| HCDA(mm)                 | 0.98±0.07  | 1.04±0.09  | 1.15±0.13  | 1.11±0.15  | <0.001   | 0.36       | <0.001      | 0.002        | 0.009                 | 0.176                  | 0.629                  |
| A2DLA(mm)                | 0.10±0.01  | 0.08±0.02  | 0.12±0.02  | 0.12±0.03  | <0.001   | 0.005      | 0.026       | 0.001        | <0.001                | <0.001                 | 0.616                  |
| DLAML(mm)                | 0.99±0.07  | 1.06±0.09  | 1.16±0.13  | 1.13±0.15  | <0.001   | 0.182      | <0.001      | <0.001       | 0.012                 | 0.14                   | 0.763                  |
| DLAMT(ms)                | 16.54±0.63 | 16.13±0.82 | 16.26±0.87 | 16.09±0.87 | 0.228    | 0.321      | 0.659       | 0.234        | 0.942                 | 0.998                  | 0.876                  |
| WEMA(mm)                 | 0.28±0.06  | 0.29±0.07  | 0.28±0.08  | 0.32±0.10  | 0.183    | 0.934      | 1.000       | 0.224        | 0.934                 | 0.544                  | 0.224                  |
| WEMT(ms)                 | 22.26±0.67 | 22.25±1.07 | 22.58±0.71 | 22.04±0.67 | 0.154    | 1.000      | 0.528       | 0.787        | 0.488                 | 0.82                   | 0.107                  |
| A1DLAr(mm <sup>2</sup> ) | 0.15±0.02  | 0.12±0.04  | 0.17±0.05  | 0.19±0.04  | <0.001   | 0.013      | 0.502       | 0.004        | <0.001                | <0.001                 | 0.169                  |
| HCDLAr(mm <sup>2</sup> ) | 3.64±0.44  | 3.91±0.50  | 4.08±0.64  | 3.90±0.74  | 0.096    | 0.415      | 0.062       | 0.451        | 0.757                 | 1.000                  | 0.722                  |
| A2DLAr(mm <sup>2</sup> ) | 0.2±0.03   | 0.14±0.04  | 0.23±0.08  | 0.29±0.10  | <0.001   | 0.02       | 0.459       | 0.001        | <0.001                | <0.001                 | 0.048                  |
| A1dArcL(mm)              | -0.01±0.00 | -0.01±0.00 | -0.02±0.00 | -0.02±0.00 | <0.001   | 0.002      | 0.783       | 0.002        | <0.001                | <0.001                 | 0.027                  |
| HCdArcL(mm)              | -0.13±0.02 | -0.06±0.04 | -0.07±0.04 | -0.11±0.04 | <0.001   | <0.001     | <0.001      | 0.433        | 0.606                 | <0.001                 | 0.01                   |
| A2dArcL(mm)              | -0.02±0.00 | -0.01±0.01 | -0.02±0.01 | -0.03±0.01 | <0.001   | 0.04       | 0.656       | 0.002        | 0.001                 | <0.001                 | 0.055                  |
| dArcLM(mm)               | -0.14±0.02 | -0.09±0.04 | -0.10±0.05 | -0.14±0.04 | <0.001   | <0.001     | 0.001       | 0.963        | 0.923                 | 0.001                  | 0.007                  |
| bIOP(mmHg)               | 13.99±0.77 | 13.72±1.79 | 14.17±2.17 | 13.89±2.11 | 0.864    | 0.957      | 0.988       | 0.997        | 0.838                 | 0.989                  | 0.953                  |

*P*, general linear model; *P*\*, Normal vs LASIK; *P*\*\*, Normal vs KE; *P*\*\*\*, Normal vs KC; *P*<sup>#</sup>, LASIK vs KE; *P*<sup>##</sup>, LASIK vs KC; *P*<sup>@@</sup>, KE vs KC, Tukey-HSD method

**Supplementary Table 2** Correlation of new Corvis ST parameters with age, Km, IOP and CCT.

| Parameters/Group   | Age    |       | Km     |        | IOP    |        | CCT    |        |
|--------------------|--------|-------|--------|--------|--------|--------|--------|--------|
|                    | r      | P     | r      | P      | r      | P      | r      | P      |
| <b>Normal</b>      |        |       |        |        |        |        |        |        |
| Max Inverse Radius | -0.188 | 0.389 | 0.408  | 0.053  | 0.045  | 0.840  | -0.186 | 0.396  |
| DA Ratio Max[2mm]  | -0.085 | 0.701 | 0.752  | <0.001 | -0.257 | 0.237  | -0.530 | 0.009  |
| Pachy Slope        | -0.483 | 0.019 | -0.088 | 0.689  | -0.054 | 0.808  | 0.326  | 0.129  |
| DA Ratio Max[1mm]  | -0.225 | 0.302 | 0.679  | <0.001 | -0.019 | 0.932  | -0.261 | 0.229  |
| ARTh               | 0.280  | 0.196 | 0.127  | 0.564  | -0.038 | 0.865  | -0.267 | 0.218  |
| Integrated Radius  | -0.148 | 0.501 | 0.305  | 0.156  | -0.125 | 0.569  | -0.026 | 0.905  |
| SP-A1              | -0.079 | 0.721 | -0.390 | 0.066  | 0.212  | 0.331  | 0.788  | <0.001 |
| CBI                | -0.254 | 0.242 | 0.203  | 0.320  | -0.082 | 0.709  | -0.148 | 0.499  |
| <b>LASIK</b>       |        |       |        |        |        |        |        |        |
| Max Inverse Radius | 0.112  | 0.610 | -0.313 | 0.145  | -0.012 | 0.956  | -0.669 | <0.001 |
| DA Ratio Max[2mm]  | -0.406 | 0.055 | -0.214 | 0.326  | -0.692 | <0.001 | -0.436 | 0.038  |
| Pachy Slope        | 0.379  | 0.075 | -0.021 | 0.923  | -0.098 | 0.655  | -0.179 | 0.413  |
| DA Ratio Max[1mm]  | -0.172 | 0.433 | -0.317 | 0.141  | -0.501 | 0.015  | -0.593 | 0.003  |
| ARTh               | -0.262 | 0.227 | 0.466  | 0.025  | 0.251  | 0.248  | 0.644  | 0.001  |
| Integrated Radius  | 0.084  | 0.703 | -0.300 | 0.124  | -0.302 | 0.162  | -0.658 | 0.001  |
| SP-A1              | 0.489  | 0.018 | -0.104 | 0.637  | 0.775  | <0.001 | 0.071  | 0.747  |
| CBI                | -0.187 | 0.393 | -0.463 | 0.026  | -0.176 | 0.422  | -0.463 | 0.026  |
| <b>KE</b>          |        |       |        |        |        |        |        |        |
| Max Inverse Radius | -0.045 | 0.839 | 0.256  | 0.239  | -0.052 | 0.813  | -0.376 | 0.077  |
| DA Ratio Max[2mm]  | 0.074  | 0.738 | 0.031  | 0.890  | -0.432 | 0.040  | -0.264 | 0.224  |
| Pachy Slope        | 0.186  | 0.394 | 0.688  | <0.001 | 0.038  | 0.864  | -0.485 | 0.019  |
| DA Ratio Max[1mm]  | -0.185 | 0.397 | -0.092 | 0.676  | -0.516 | 0.012  | -0.214 | 0.327  |
| ARTh               | -0.045 | 0.839 | -0.557 | 0.006  | 0.033  | 0.880  | -0.766 | <0.001 |
| Integrated Radius  | -0.150 | 0.496 | 0.051  | 0.817  | -0.440 | 0.035  | -0.348 | 0.104  |
| SP-A1              | 0.233  | 0.286 | -0.331 | 0.122  | 0.264  | 0.223  | 0.618  | 0.002  |
| CBI                | -      | -     | -      | -      | -      | -      | -      | -      |
| <b>KC</b>          |        |       |        |        |        |        |        |        |
| Max Inverse Radius | -0.505 | 0.014 | 0.482  | 0.020  | -0.289 | 0.180  | -0.323 | 0.132  |
| DA Ratio Max[2mm]  | -0.347 | 0.105 | 0.689  | <0.001 | -0.660 | 0.001  | -0.348 | 0.103  |
| Pachy Slope        | -0.470 | 0.024 | 0.655  | 0.001  | -0.335 | 0.118  | -0.419 | 0.047  |
| DA Ratio Max[1mm]  | -0.241 | 0.268 | 0.534  | 0.009  | -0.519 | 0.011  | -0.272 | 0.209  |
| ARTh               | 0.499  | 0.015 | -0.840 | <0.001 | 0.439  | 0.036  | 0.574  | 0.004  |
| Integrated Radius  | -0.442 | 0.035 | 0.496  | 0.016  | -0.620 | 0.002  | -0.344 | 0.108  |
| SP-A1              | 0.502  | 0.015 | -0.818 | <0.001 | 0.721  | <0.001 | 0.464  | 0.026  |
| CBI                | -0.598 | 0.003 | 0.769  | <0.001 | -0.476 | 0.022  | -0.506 | 0.014  |

Spearman correlation: Max Inverse Radius, DA Ratio Max [2mm], DA Ratio Max [1mm], ARTh, SP-A1 and CBI. Pearson correlation: Pachy Slope and Integrated Radius.
